# Supplementary material for: A deep learning approach to increase the value of satellite data for PM 2.5 monitoring in China
Source: Copernicus journal article supplement (doi:10.5194/egusphere-2022-578), 2022-07-12
Supplement: Supplementary file 1 [file egusphere-2022-578-supplement.pdf]

## **A deep learning approach to increase the value of satellite data for PM<sub>2.5</sub> monitoring in China**

Bo Li, Cheng Liu, Qihou Hu, Mingzhai Sun, Chengxin Zhang, Shulin Zhang, Yizhi Zhu, Ting

Liu, Yike Guo, Martin G. Schultz, Gregory R. Carmichael, Meng Gao

### **This file includes:**

- **Figure. S1. Validation of meteorological parameters simulated by WRF with observation data at ISD (Integrated Surface Database) stations.** (a) temperature. (b) pressure. (c) wind speeds.
- **Figure. S2. The architecture of the ST-NN model. Data include AOD, meteorological data and geographic data.** All the input variables have the 4-D dimensions as [N, lat\_size, lon\_size, channel]. N means the batch size, lat\_size and lon\_size means the scale of the data at latitude and longitude, channels mean the types or the height/time dimension of the data. And considering the computational efficiency and the generalization ability of the model, we choose N as 4.
- **Figure. S3. Locations and spatial range of major study regions.** Study regions include North China, East China, South China, Sichuan Basin and Shaanxi Province.
- **Figure. S4. The annual average distribution of PM<sub>2.5</sub> in Beijing.** It can be seen that the main pollution comes from the southwest, significantly influenced by topography and transmission.

- Figure. S5. ST-NN model predicted and ground-level observed (not used in training) time series of PM<sub>2.5</sub> in Beijing stations.** (a) Dongsì station in Beijing. (b) Tiantan station in Beijing. (c) Guanyuan station in Beijing. (d) Aotizhognxin station in Beijing. (e) Daxing station in Beijing. (f) Changping station in Beijing. (g) Miyun station in Beijing. (h) Dingling station in Beijing.
- Figure. S6. ST-NN model predicted and ground-level observed (not used in training) time series of PM<sub>2.5</sub> in China, and comparisons of their diurnal features.** Left column: ST-NN model predicted and ground-level observed (not used in training) time series (2017) of PM<sub>2.5</sub> in China, and comparisons of their diurnal features. Left column: ST-NN model predicted and observed time series of PM<sub>2.5</sub> in Wuhan (a1), Suzhou (b1), Zhongshan (c1), Jiangmen (d1), Guanyuan in Beijing (e1), Miyun in Beijing (f1); Right column: ST-NN model predicted and observed diurnal variation of PM<sub>2.5</sub> in Wuhan (a2), Suzhou (b2), Zhongshan (c2), Jiangmen (d2), Guanyuan in Beijing (e2), Miyun in Beijing (f2).
- Figure.S7. The block distribution of the regional mask validation.** Validation was carried out for different spatial mask scales, the black points are the training sites, and the R-square distribution of the validation sites is enclosed by the solid blue line.
- Figure.S8. Time series of the regional mask performed (Figure.S6b, c, d).** It can be seen that the model can capture pollution effectively.
- Figure. S9. Time series of the regional mask performed (Figure.S6a),** they are the 2°x2° mask validation in the North China. The blue line is the CNEMC data, the orange line is the ST-NN result for clear day, the red line is the ST-NN result for

cloudy day.

- **Figure. S10. Density scatterplots of the ST-NN model** (trained with data from 2017 to 2020 and test with 2020) with hourly(a),monthly(b),annual(c) validation. The fitting line is in purple, and the 1:1 standard line is the black dotted line.
- **Figure. S11 Relative error of cross validation under different cloud coverage rates.**
- **Figure. S12. The density distribution diagram of changes in predicted  $PM_{2.5}$  concentrations as a function of relative humidity in marked cloudy conditions.** (a) North China. (b) East China. (c) South China. (d) Sichuan Basin.
- **Figure. S13. The distribution of predicted annual mean concentrations of  $PM_{2.5}$  and the locations of monitoring sites.**
- **Figure. S14. Relative importance indicators ( $R_r$ : Relative range;  $R_g$ : Relative gradient;  $R_v$ : Relative variance;  $R_{AAD}$ : Relative average absolute deviation) of input variables for different regions.** (a-d) North China. (e-h) East China. (i-l) South China. (m-p) Sichuan Basin. (q-t) Shaanxi Province.
- **Figure. S15. Results of sensitivity analysis of key variables.**
- **Figure. S16. Relative error varies with  $PM_{2.5}$  concentrations in different regions.** Five lines with different colors represent errors for North China, East China, South China, Sichuan Basin, and Shaanxi Province.
- **Figure. S17. The relationship between the mean absolute error of the model and the relative error of different input data.** Seven lines with different colors represent model inputs: pressure, temperature, zonal wind (U), meridional wind (V), boundary

layer height, relative humidity, and AOD.

- **Figure. S18. The performance of the validation data logcosh loss function for models built for different regions.** Five lines with different colors represent results for North China, East China, South China, Sichuan Basin, and Shaanxi Province.
- **Figure. S19. The spatiotemporal distribution of CNEMC observed PM<sub>2.5</sub> concentrations.** (a) Year 2017. (b) Year 2018. (c) Year 2019. (d) Year 2020. (e) Monthly variations.
- **Table S1.** Number of CNEMC stations at different population densities (people/km<sup>2</sup>).
- **Table S2.** The occurrences of marked cloudy conditions.
- **Table S3.** Descriptions of considered variables.
- **Table S4.** MODIS MCD12C1 Land Cover Types.
- **Table S5.** Traffic Network classification.
- **Table S6.** Point of Interest classification.
- **Table S7.** The  $\alpha$  of bivariate test between each parameter and PM<sub>2.5</sub>.
- **Table S8.** The spatial ranges of study regions.
- **Table S9.** Major features of previous related studies.
- **Table S10.** The influences of different data quality treatments on the performance of the model.
- **Table S11.** Data quality control status.
- **Table S12.** Statistics of number of stations used for training and testing
- **Table S13.** Validation results for different scales of spatial region mask. Validation results for 1x1, 2x2, 3x3, 4x4 degree masks over a general area.

- **Table.S14.** Hourly validation of Near Real Time model (trained with data from 2017 to 2020 and test with 2020). With overall validation R-square above 0.55, we find that the model validates worse in scenarios with lower surface PM<sub>2.5</sub> concentrations, mainly due to the large uncertainty in both the CNEMC site and satellite aerosol products at low PM<sub>2.5</sub> concentrations.
- **Table.S15.** Assess the ability of the model to capture different levels of contamination through accuracy and precision. Accuracy and precision rates are defined under. The model results and national control site results are divided according to thresholds, with values greater than the threshold defined as positive samples and values less than the threshold defined as negative samples. The model result and the national control site are both positive samples are defined as TP, the model result is a positive sample and the national control site is a negative sample is defined as FP. The model result and the national control site are both negative samples defined as FN, the model result is a negative sample, and the national control site is a positive sample defined as TN.

$$Accuracy = \frac{TP + TN}{TP + TN + FP + FN}$$

$$Precision = \frac{TP}{TP + FP}$$

**Table S1.** Number of CNEMC stations at different population densities (people/km<sup>2</sup> ) and the area percentage of different population densities (within parentheses).

|               | <1    | 1~25  | 25~100 | 100~500 | 500~1000 | >1000  |
|---------------|-------|-------|--------|---------|----------|--------|
| North China   | 0(7)  | 2(18) | 0(25)  | 12(30)  | 37(16)   | 125(4) |
| East China    | 0(3)  | 0(0)  | 1(6)   | 39(59)  | 56(25)   | 247(7) |
| South China   | 0(13) | 0(0)  | 5(7)   | 37(69)  | 45(7)    | 150(4) |
| Sichuan Basin | 0(0)  | 0(25) | 7(17)  | 33(48)  | 54(8)    | 51(2)  |

Shaanxi Province 0(0) 0(7) 0(30) 41(52) 35(9) 101(2)

**Table S2.** The occurrences of marked cloudy conditions.

|       | 2017             | Spring | Summer | Autumn | Winter | Year |
|-------|------------------|--------|--------|--------|--------|------|
| MODIS | North China      | 0.62   | 0.66   | 0.60   | 0.83   | 0.67 |
|       | Eastern China    | 0.66   | 0.76   | 0.71   | 0.69   | 0.71 |
|       | South China      | 0.86   | 0.88   | 0.79   | 0.77   | 0.83 |
|       | Sichuan Basin    | 0.81   | 0.80   | 0.84   | 0.83   | 0.82 |
|       | Shaanxi Province | 0.66   | 0.66   | 0.68   | 0.74   | 0.68 |

**Table S3.** Descriptions of considered variables.

| Product         | Unit                   | Variable Definition             | Spatial Resolution | Temporal Resolution |
|-----------------|------------------------|---------------------------------|--------------------|---------------------|
| AOD             |                        | Aerosol optical depth           | 0.05°×0.05°        | 1hour               |
| Tempc           | °C                     | Temperature                     | 0.05°×0.05°×12     | 1hour               |
| RH              | %                      | Relative Humidity               | 0.05°×0.05°×12     | 1hour               |
| HPBL            | m                      | Planetary Boundary Layer Height | 0.05°×0.05°        | 1hour               |
| P               | Hpa                    | Pressure                        | 0.05°×0.05°×12     | 1hour               |
| U               | m/s                    | Wind Speed (U)                  | 0.05°×0.05°×12     | 1hour               |
| V               | m/s                    | Wind Speed (V)                  | 0.05°×0.05°×12     | 1hour               |
| DEM             | m                      | Digital Elevation Model         | 0.01°×0.01°        | Annual              |
| POI             |                        | Point of Interest               | 0.01°×0.01°        | Annual              |
| Traffic Network |                        | Traffic Network                 | 0.01°×0.01°        | Annual              |
| GDP             | ¥ /km <sup>2</sup>     | Gross Domestic Product          | 0.01°×0.01°        | Annual              |
| TPOP            | people/km <sup>2</sup> | population density              | 0.01°×0.01°        | Annual              |
| Land Cover Type |                        | Land Cover Type                 | 0.05°×0.05°        | Annual              |

**Table S4.** MODIS MCD12C1 Land Cover Type

| Class | Description                 | Class | Description                        |
|-------|-----------------------------|-------|------------------------------------|
| 0     | water                       | 9     | savannas                           |
| 1     | evergreen needleleaf forest | 10    | grasslands                         |
| 2     | evergreen broadleaf forest  | 11    | permanent wetlands                 |
| 3     | deciduous needleleaf forest | 12    | croplands                          |
| 4     | deciduous broadleaf forest  | 13    | urban and built-up                 |
| 5     | mixed forests               | 14    | cropland/natural vegetation mosaic |
| 6     | closed shrubland            | 15    | snow and ice                       |
| 7     | open shrublands             | 16    | barren or sparsely vegetated       |
| 8     | woody savannas              |       |                                    |

**Table S5.** Traffic Network classification.

| Class | Description    | Class | Description  |
|-------|----------------|-------|--------------|
| 0     | primary        | 5     | track        |
| 0     | primary_link   | 5     | track_grade  |
| 1     | secondary      | 6     | trunk        |
| 1     | secondary_link | 6     | trunk_link   |
| 2     | tertiary       | 6     | bridleway    |
| 2     | tertiary_link  | 7     | unknown      |
| 3     | motorway       | 7     | unclassified |
| 3     | motorway_link  | 8     | footway      |
| 4     | living_street  | 8     | path         |
| 4     | residential    | 8     | pedestrian   |
| 4     | steps          |       |              |
| 4     | service        |       |              |
| 4     | cycleway       |       |              |

**Table S6.** Point of Interest classification.

| Class | Description                       | Class | Description                     |
|-------|-----------------------------------|-------|---------------------------------|
| 01    | automobile service                | 03    | health care service             |
| 01    | car sale                          | 03    | accommodation service           |
| 01    | vehicle maintenance and repair    | 03    | serviced apartment              |
| 01    | Motorcycle service                | 04    | tourist attraction              |
| 01    | transportation facilities service | 05    | education and culture service   |
| 02    | catering service                  | 06    | government organization         |
| 02    | shopping service                  | 06    | financial and insurance service |
| 03    | life services                     | 06    | incorporated business           |
| 03    | spot and leisure services         | 07    | factory                         |

**Table S7.** The  $\alpha$  of bivariate test between each parameter and PM<sub>2.5</sub>.

| $\alpha$          | Himawari-8 AOD | MOD04 | MYD04 | Tempc | Pressure | RH | HPBL | U | V | DEM | POI  | GDP   | TPOP  |
|-------------------|----------------|-------|-------|-------|----------|----|------|---|---|-----|------|-------|-------|
| PM <sub>2.5</sub> | 0              | 0     | 0     | 0     | 0        | 0  | 0    | 0 | 0 | 0   | 0.03 | 0.036 | 0.013 |

**Table S8.** The spatial ranges of study regions.

|                  | top_latitude | bottom_latitude | left_longitude | right_longitude |
|------------------|--------------|-----------------|----------------|-----------------|
| North China      | 45°N         | 35°N            | 110°E          | 120°E           |
| East China       | 36°N         | 26°N            | 112°E          | 122°E           |
| South China      | 30°N         | 20°N            | 108°E          | 118°E           |
| Sichuan Basin    | 36°N         | 26°N            | 100°E          | 110°E           |
| Shaanxi Province | 40°N         | 30°N            | 105°E          | 115°E           |

**Table S9.** Major features of previous related studies.

| Study  | Model     | Resolution | Study Area        | Sample Validation |       |      | Space Validation |      |      | Time Validation |      |      |
|--------|-----------|------------|-------------------|-------------------|-------|------|------------------|------|------|-----------------|------|------|
|        |           |            |                   | R <sup>2</sup>    | RMSE  | Slop | R <sup>2</sup>   | RMSE | Slop | R <sup>2</sup>  | RMSE | Slop |
| (Ma et | Two-Stage | 0.1° daily | China (2004–2013) | 0.79              | 27.42 | 0.79 | -                | -    | -    | -               | -    | -    |

|         |              |                        |                      |      |       |      |      |       |      |      |       |      |
|---------|--------------|------------------------|----------------------|------|-------|------|------|-------|------|------|-------|------|
| al.     |              |                        |                      |      |       |      |      |       |      |      |       |      |
| 2016)   |              |                        |                      |      |       |      |      |       |      |      |       |      |
| (Fang   |              |                        |                      |      |       |      |      |       |      |      |       |      |
| et al.  | TSAM         | 10km daily             | China                | 0.80 | 22.75 | 0.79 | -    | -     | -    | -    | -     | -    |
| 2016)   |              |                        | (2013.6~2014.5)      |      |       |      |      |       |      |      |       |      |
| (Wang   |              |                        |                      |      |       |      |      |       |      |      |       |      |
| et al.  | Linear       | 0.03° night            | Atlanta city         | -    | -     | -    | 0.45 | 4.11  | 1.00 | -    | -     | -    |
| 2016)   | Regression   |                        | (2012.8~2012.10)     |      |       |      |      |       |      |      |       |      |
| (Wei et |              |                        |                      |      |       |      |      |       |      |      |       |      |
| al.     | GWR          | 3km daily              | China(2014)          | 0.79 | 18.60 | 0.83 | -    | -     | -    | -    | -     | -    |
| 2016)   |              |                        |                      |      |       |      |      |       |      |      |       |      |
| (Li et  |              |                        |                      |      |       |      |      |       |      |      |       |      |
| al.     | Geoi-DBN     | 10km daily             | China (2015)         | 0.88 | 13.03 | 0.88 | 0.82 | 16.42 | 0.86 | -    | -     | -    |
| 2017)   |              |                        |                      |      |       |      |      |       |      |      |       |      |
| (Yu et  |              |                        |                      |      |       |      |      |       |      |      |       |      |
| al.     | Gauss        | 10km daily             | China (2013)         | 0.81 | 21.87 | 0.73 | -    | -     | -    | -    | -     | -    |
| 2017)   |              |                        |                      |      |       |      |      |       |      |      |       |      |
| (Xiao   |              |                        |                      |      |       |      |      |       |      |      |       |      |
| et al.  | Multiple     | 1km daily              | Yangtze River Delta  | 0.81 | 25.00 | 0.99 | -    | -     | -    | -    | -     | -    |
| 2017)   | Imputation   | (full coverage)        | (2013~2014)          |      |       |      |      |       |      |      |       |      |
| (He and |              |                        |                      |      |       |      |      |       |      |      |       |      |
| Huang   | GTWR         | 3km daily              | China (2015)         | 0.80 | 18.00 | 0.81 | 0.75 | 20.73 | 0.79 | 0.58 | 28.24 | 0.61 |
| 2018)   |              |                        |                      |      |       |      |      |       |      |      |       |      |
| (Fu et  |              |                        |                      |      |       |      |      |       |      |      |       |      |
| al.     | Mixed-Effect | 0.01° night            | Beijing              | -    | -     | -    | 0.86 | 32.4  | -    | -    | -     | -    |
| 2018)   |              |                        | (2013.12~2014.11)    |      |       |      |      |       |      |      |       |      |
| (Shtein |              |                        |                      |      |       |      |      |       |      |      |       |      |
| et al.  | GAM          | 1km daily              | Italy (2013~2015)    | -    | -     | -    | 0.80 | 6.06  | 0.99 | -    | -     | -    |
| 2019)   |              |                        |                      |      |       |      |      |       |      |      |       |      |
| (Chen   |              |                        |                      |      |       |      |      |       |      |      |       |      |
| et al.  | SMLM         | 0.05° hourly           | covers most of China | 0.85 | 17.30 | 0.86 | -    | -     | -    | -    | -     | -    |
| 2019)   |              | (daytime)              | (2016)               |      |       |      |      |       |      |      |       |      |
| (Zhang  |              |                        |                      |      |       |      |      |       |      |      |       |      |
| et al.  | ST-LME       | 5km hourly             | east-central         | 0.80 | -     | -    | -    | -     | -    | -    | -     | -    |
| 2019)   |              | (daytime)              | China(2015.7~2017.7) |      |       |      |      |       |      |      |       |      |
| (Wei et |              |                        |                      |      |       |      |      |       |      |      |       |      |
| al.     | ST-RF        | 1km daily              | China (2015)         | 0.85 | 15.57 | 0.82 | 0.83 | 16.63 | 0.81 | 0.63 | 24.83 | 0.62 |
| 2019)   |              |                        |                      |      |       |      |      |       |      |      |       |      |
| (Bi et  |              |                        |                      |      |       |      |      |       |      |      |       |      |
| al.     | RF           | 1km daily              | New York State       | 0.82 | 2.16  | 1.05 | -    | -     | -    | -    | -     | -    |
| 2019)   |              | (full coverage)        | (2015)               |      |       |      |      |       |      |      |       |      |
| (Zhang  |              |                        |                      |      |       |      |      |       |      |      |       |      |
| et al.  | XGBoost      | 3km daily              | China                | 0.87 | 16.33 | -    | 0.86 | 17.89 | -    | 0.67 | 25.87 | -    |
| 2019)   |              | (nearly full coverage) | (2014~2015)          |      |       |      |      |       |      |      |       |      |



|                           |                   |                                              |                                     |      |       |      |      |       |      |      |       |      |
|---------------------------|-------------------|----------------------------------------------|-------------------------------------|------|-------|------|------|-------|------|------|-------|------|
| (Tand<br>et al.<br>2019)  | Two-Stage<br>RF   | 1km hourly<br>(full day)<br>(full coverage)  | Yangtze River Delta<br>(2017)       | -    | -     | -    | 0.86 | 12.4  | 0.81 | -    | -     | -    |
| (Liu et<br>al.<br>2019)   | RF                | 5km<br>hourly(daytime)                       | China(2016)                         | 0.86 | 17.20 | 0.81 | -    | -     | -    | -    | -     | -    |
| (Jiang<br>et al.<br>2020) | Two-Stage<br>RF   | 1km hourly(full<br>day)<br>(full coverage)   | China(2018)                         | 0.85 | 11.02 | -    | 0.74 | 14.65 | -    | -    | -     | -    |
| (Wei et<br>al.<br>2020)   | Enhanced<br>ST-ET | 1km daily                                    | China<br>(2017–2018)                | 0.89 | 10.33 | 0.86 | 0.88 | 10.93 | 0.85 | -    | -     | -    |
| (Park et<br>al.<br>2020)  | CNN-RF            | 12km daily                                   | America (2011)                      | 0.84 | 2.55  | 1.04 | 0.69 | 3.55  | 1.00 | 0.84 | 2.55  | 1.05 |
| This<br>study             | ST-NN             | 0.01° hourly<br>(full day)(full<br>coverage) | covers most of China<br>(2017–2020) | 0.88 | 12.98 | 0.99 | 0.85 | 14.33 | 1.02 | 0.86 | 14.69 | 1.02 |

## References:

- Ma, Z.; Hu, X.; Sayer, A. M.; Levy, R.; Zhang, Q.; Xue, Y.; Tong, S.; Bi, J.; Huang, L.; Liu, Y., Satellite-based spatiotemporal trends in PM<sub>2.5</sub> concentrations: China, 2004–2013. *Environmental health perspectives* 2016, 124, (2), 184–192.
- Fang, X.; Zou, B.; Liu, X.; Sternberg, T.; Zhai, L., Satellite-based ground PM<sub>2.5</sub> estimation using timely structure adaptive modeling. *Remote Sensing of Environment* 2016, 186, 152–163.
- Wang, J.; Aegerter, C.; Xu, X.; Szykman, J. J., Potential application of VIIRS Day/Night Band for monitoring nighttime surface PM<sub>2.5</sub> air quality from space. *Atmospheric environment* 2016, 124, 55–63.
- You, W.; Zang, Z.; Zhang, L.; Li, Y.; Pan, X.; Wang, W., National-scale estimates of ground-level PM<sub>2.5</sub> concentration in China using geographically weighted regression based on 3 km resolution MODIS AOD. *Remote Sensing* 2016, 8, (3), 184.
- Li, T.; Shen, H.; Yuan, Q.; Zhang, X.; Zhang, L., Estimating ground-level PM<sub>2.5</sub> by fusing satellite and station observations: a geo-intelligent deep learning approach. *Geophysical Research Letters* 2017, 44, (23), 11,985–11,993.
- Yu, W.; Liu, Y.; Ma, Z.; Bi, J., Improving satellite-based PM<sub>2.5</sub> estimates in China using Gaussian processes modeling in a Bayesian hierarchical setting. *Scientific reports* 2017, 7, (1), 1–9.
- Xiao, Q.; Wang, Y.; Chang, H. H.; Meng, X.; Geng, G.; Lyapustin, A.; Liu, Y., Full-coverage high-resolution daily PM<sub>2.5</sub> estimation using MAIAC AOD in the Yangtze River Delta of China. *Remote Sensing of Environment* 2017, 199, 437–446.
- He, Q.; Huang, B., Satellite-based mapping of daily high-resolution ground PM<sub>2.5</sub> in China via space-time regression modeling. *Remote Sensing of Environment* 2018, 206, 72–83.
- Fu, D.; Xia, X.; Duan, M.; Zhang, X.; Li, X.; Wang, J.; Liu, J., Mapping nighttime PM<sub>2.5</sub> from VIIRS DNB using a linear mixed-effect model. *Atmospheric Environment* 2018, 178, 214–222.
- Shtein, A.; Kloog, I.; Schwartz, J.; Silibello, C.; Michelozzi, P.; Gariazzo, C.; Viegi, G.; Forastiere, F.; Karnieli, A.; Just, A. C., Estimating daily PM<sub>2.5</sub> and PM<sub>10</sub> over Italy using an ensemble model. *Environmental science &*

technology 2019, 54, (1), 120-128.

Chen, J.; Yin, J.; Zang, L.; Zhang, T.; Zhao, M., Stacking machine learning model for estimating hourly PM<sub>2.5</sub> in China based on Himawari 8 aerosol optical depth data. *Science of The Total Environment* 2019, 697, 134021.

Zhang, T.; Zang, L.; Wan, Y.; Wang, W.; Zhang, Y., Ground-level PM<sub>2.5</sub> estimation over urban agglomerations in China with high spatiotemporal resolution based on Himawari-8. *Science of the total environment* 2019, 676, 535-544.

Wei, J.; Huang, W.; Li, Z.; Xue, W.; Peng, Y.; Sun, L.; Cribb, M., Estimating 1-km-resolution PM<sub>2.5</sub> concentrations across China using the space-time random forest approach. *Remote Sensing of Environment* 2019, 231, 111221.

Bi, J.; Belle, J. H.; Wang, Y.; Lyapustin, A. I.; Wildani, A.; Liu, Y., Impacts of snow and cloud covers on satellite-derived PM<sub>2.5</sub> levels. *Remote sensing of environment* 2019, 221, 665-674.

Chen, Z.-Y.; Zhang, T.-H.; Zhang, R.; Zhu, Z.-M.; Yang, J.; Chen, P.-Y.; Ou, C.-Q.; Guo, Y., Extreme gradient boosting model to estimate PM<sub>2.5</sub> concentrations with missing-filled satellite data in China. *Atmospheric Environment* 2019, 202, 180-189.

Tang, D.; Liu, D.; Tang, Y.; Seyler, B. C.; Deng, X.; Zhan, Y., Comparison of GOCI and Himawari-8 aerosol optical depth for deriving full-coverage hourly PM<sub>2.5</sub> across the Yangtze River Delta. *Atmospheric Environment* 2019, 217, 116973.

Liu, J.; Weng, F.; Li, Z., Satellite-based PM<sub>2.5</sub> estimation directly from reflectance at the top of the atmosphere using a machine learning algorithm. *Atmospheric Environment* 2019, 208, 113-122.

Jiang, T.; Chen, B.; Nie, Z.; Ren, Z.; Xu, B.; Tang, S., Estimation of hourly full-coverage PM<sub>2.5</sub> concentrations at 1-km resolution in China using a two-stage random forest model. *Atmospheric Research* 2021, 248, 105146.

Wei, J.; Li, Z.; Cribb, M.; Huang, W.; Xue, W.; Sun, L.; Guo, J.; Peng, Y.; Li, J.; Lyapustin, A., Improved 1 km resolution PM<sub>2.5</sub> estimates across China using enhanced space-time extremely randomized trees. *Atmospheric Chemistry and Physics* 2020, 20, (6), 3273-3289.

Park, Y.; Kwon, B.; Heo, J.; Hu, X.; Liu, Y.; Moon, T., Estimating PM<sub>2.5</sub> concentration of the conterminous United States via interpretable convolutional neural networks. *Environmental Pollution* 2020, 256, 113395.

**Table S10.** The influences of different data quality treatments on the performance of the model.

| train                | test                 | RMSE  | MAE   | Slope | R-square |
|----------------------|----------------------|-------|-------|-------|----------|
| without empty data   | without empty data   | 16.53 | 10.10 | 0.98  | 0.87     |
|                      | without outlier data | 14.62 | 9.55  | 0.96  | 0.87     |
| without outlier data | without empty data   | 18.24 | 10.46 | 1.06  | 0.84     |
|                      | without outlier data | 14.30 | 9.46  | 1.00  | 0.87     |

**Table S11.** Data quality control status.

|             | 2017(N) |          | 2018(N) |          | 2019(N) |          | 2020(N) |          | Rate |
|-------------|---------|----------|---------|----------|---------|----------|---------|----------|------|
|             | outlier | not null |      |
| North China | 188547  | 1340252  | 186265  | 1241169  | 180120  | 1257882  | 175359  | 1228487  | 0.14 |
| East China  | 420792  | 2663647  | 364102  | 2525520  | 395344  | 2478030  | 381681  | 2503516  | 0.15 |

|                  |        |         |        |         |        |         |        |         |      |
|------------------|--------|---------|--------|---------|--------|---------|--------|---------|------|
| South China      | 325190 | 1957469 | 280304 | 1875939 | 298656 | 1865894 | 342722 | 1908516 | 0.16 |
| Sichuan Basin    | 170788 | 1132051 | 168210 | 1043238 | 167905 | 1044349 | 170819 | 1062847 | 0.16 |
| Shaanxi Province | 189610 | 1369405 | 184997 | 1280065 | 184698 | 1277902 | 199430 | 1301866 | 0.15 |

**Table S12.** Statistics of number of stations used for training and testing

|                  | All       | Training  | Testing   | All Sample Number(N) |         |         |         |
|------------------|-----------|-----------|-----------|----------------------|---------|---------|---------|
|                  | Number(N) | Number(N) | Number(N) | 2017                 | 2018    | 2019    | 2020    |
| North China      | 176       | 150       | 26        | 1340252              | 1241169 | 1257882 | 1228487 |
| East China       | 343       | 308       | 35        | 2663647              | 2525520 | 2478030 | 2503516 |
| South China      | 237       | 213       | 24        | 1957469              | 1875939 | 1865894 | 1908516 |
| Sichuan Basin    | 145       | 130       | 15        | 1132051              | 1043238 | 1044349 | 1062847 |
| Shaanxi Province | 177       | 159       | 18        | 1369405              | 1280065 | 1277902 | 1301866 |

**Table.S13.** Validation results for different scales of spatial region mask.

| Train Area | 36°~44°N       |             | 27°~35°N       |             |            |             |            |             |            |             |            |             |            |             |            |             |
|------------|----------------|-------------|----------------|-------------|------------|-------------|------------|-------------|------------|-------------|------------|-------------|------------|-------------|------------|-------------|
|            | 111°~119°E     |             | 123°~121°E     |             |            |             |            |             |            |             |            |             |            |             |            |             |
| Mask Area  | 38.2°~40.2°N   |             | 29°~33°N       |             | 30°~33°N   |             | 31°~33°N   |             | 32°~33°N   |             | 32°~33°N   |             | 31°~32°N   |             | 31°~32°N   |             |
|            | 114.1°~116.1°E |             | 116°~120°E     |             | 117°~120°E |             | 118°~120°E |             | 118°~119°E |             | 119°~120°E |             | 118°~119°E |             | 119°~120°E |             |
| R-square   | Num<br>ber     | Rate<br>(%) | Nu<br>mbe<br>r | Rate<br>(%) | Num<br>ber | Rate<br>(%) |
| <0.5       | /              | /           | 5              | 0.05        | 1          | 0.01        | /          | /           | /          | /           | /          | /           | /          | /           | /          | /           |
| 0.5~0.6    | /              | /           | 9              | 0.09        | 4          | 0.05        | /          | /           | /          | /           | /          | /           | /          | /           | /          | /           |
| 0.6~0.65   | /              | /           | 14             | 0.14        | 6          | 0.08        | /          | /           | /          | /           | /          | /           | /          | /           | /          | /           |
| 0.65~0.7   | /              | /           | 34             | 0.35        | 21         | 0.28        | 2          | 0.05        | /          | /           | /          | /           | /          | /           | /          | /           |
| 0.7~0.75   | 1              | 0.17        | 24             | 0.24        | 24         | 0.32        | 9          | 0.22        | /          | /           | 1          | 0.12        | /          | /           | 2          | 0.18        |
| 0.75~0.8   | 5              | 0.83        | 6              | 0.06        | 10         | 0.13        | 19         | 0.48        | 3          | 0.25        | 6          | 0.76        | /          | /           | 5          | 0.45        |
| >0.8       | /              | /           | 6              | 0.06        | 10         | 0.13        | 10         | 0.25        | 9          | 0.75        | 1          | 0.12        | 9          | 1           | 4          | 0.37        |

**Table.S14.** Hourly validation of Near Real Time model (trained with data from 2017 to 2020 and test with 2020).

| R-squre | Number | CNEMC mean | ST-NN mean |
|---------|--------|------------|------------|
| <0.4    | 10     | 16.26      | 19.81      |

|          |    |       |       |
|----------|----|-------|-------|
| 0.4~0.45 | 8  | 35.28 | 30.51 |
| 0.45~0.5 | 21 | 35.73 | 35.44 |
| 0.5~0.55 | 26 | 41.17 | 43.72 |
| 0.55~0.6 | 30 | 40.70 | 43.96 |
| 0.6~0.65 | 20 | 39.47 | 41.74 |
| 0.65~0.7 | 26 | 41.26 | 45.04 |
| >0.7     | 9  | 42.30 | 47.40 |

Table.S15. Assess the ability of the model to capture different levels of contamination through accuracy and precision.

|         | North China NRT<br>model ( $>75\mu\text{g}/\text{m}^3$ ) |           | 29°~33°N,116°~120°E<br>mask ( $>75\mu\text{g}/\text{m}^3$ ) |           | 30°~33°N,117°~120°E<br>mask ( $>75\mu\text{g}/\text{m}^3$ ) |           | 31°~33°N,118°~120°E<br>mask ( $>75\mu\text{g}/\text{m}^3$ ) |           |
|---------|----------------------------------------------------------|-----------|-------------------------------------------------------------|-----------|-------------------------------------------------------------|-----------|-------------------------------------------------------------|-----------|
| value   | Number                                                   |           | Number                                                      |           | Number                                                      |           | Number                                                      |           |
|         | accuracy                                                 | precision | accuracy                                                    | precision | accuracy                                                    | precision | accuracy                                                    | precision |
| <0.4    | /                                                        | 14        | /                                                           | 9         | /                                                           | 0         | /                                                           | 1         |
| 0.4~0.5 | /                                                        | 6         | /                                                           | 16        | /                                                           | 1         | /                                                           | 0         |
| 0.5~0.6 | /                                                        | 15        | /                                                           | 21        | /                                                           | 6         | /                                                           | 4         |
| 0.6~0.7 | /                                                        | 28        | /                                                           | 28        | /                                                           | 13        | /                                                           | 13        |
| 0.7~0.8 | /                                                        | 28        | /                                                           | 14        | /                                                           | 24        | /                                                           | 11        |
| 0.8~0.9 | 31                                                       | 22        | 3                                                           | 7         | /                                                           | 20        | /                                                           | 8         |
| >0.9    | 100                                                      | 18        | 95                                                          | 3         | 82                                                          | 18        | 45                                                          | 8         |

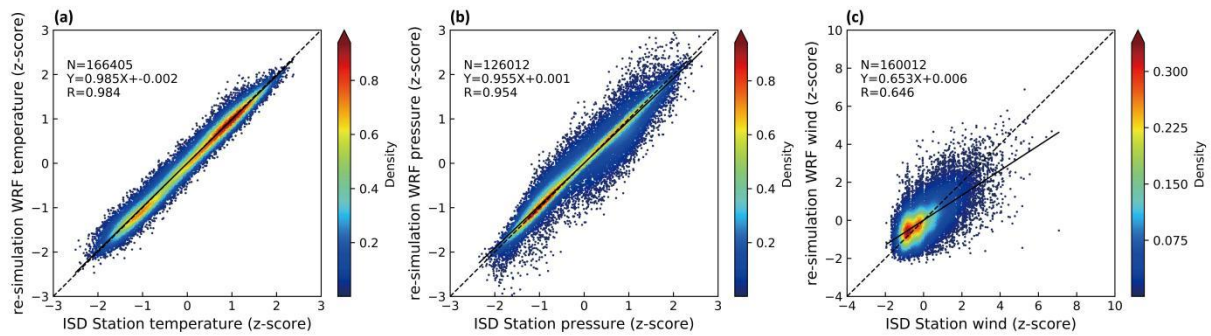

**Figure. S1.** Validation of meteorological parameters simulated by WRF with observation data at ISD (Integrated Surface Database) stations. (a) temperature. (b) pressure. (c) wind speeds.

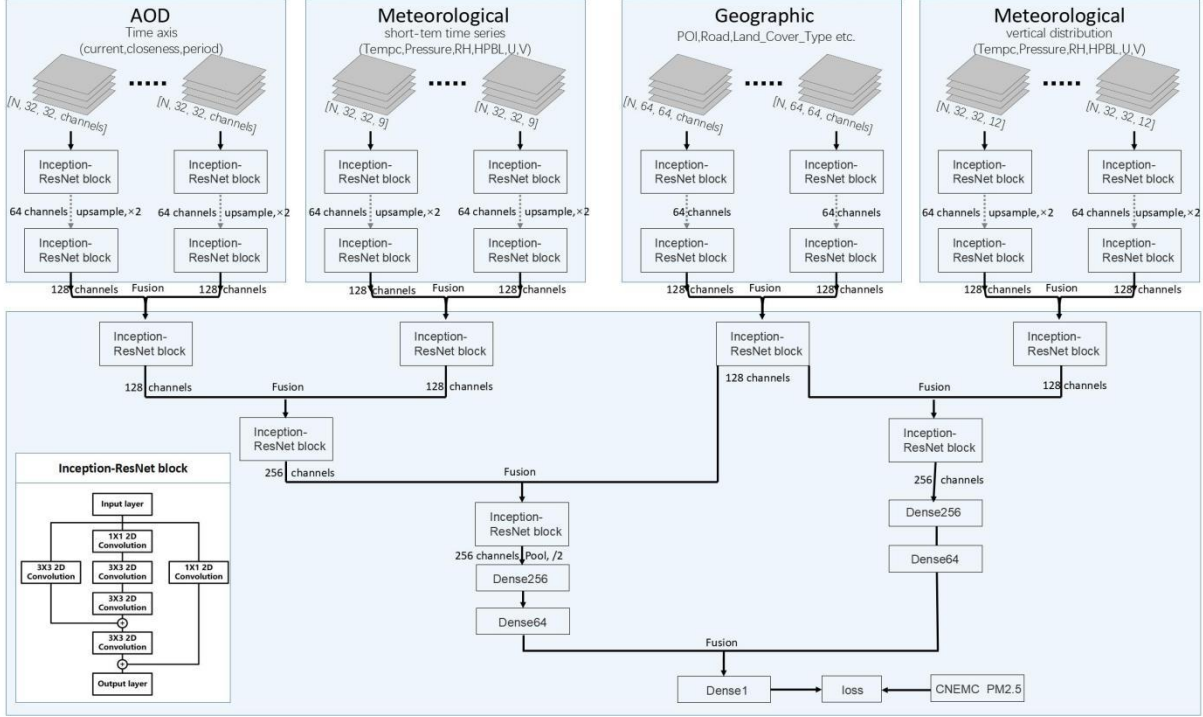

**Figure. S2.** The architecture of the ST-NN model. Inputs data include AOD, meteorological

data and geographic data. All the input variables have the 4-D dimensions as  $[N, \text{lat\_size},$

$\text{lon\_size}, \text{channel}]$ .  $N$  means the batch size,  $\text{lat\_size}$  and  $\text{lon\_size}$  means the scale of the data at

latitude and longitude, channels represent the types or the height/time dimension of the data.

Considering the computational efficiency and the generalization ability of the model, we

choose  $N$  as 4. First, feature extraction was used for individual data by Inception-ResNet,

which is an efficient feature extraction process. After it, we up-sampled the data at  $0.05^\circ \times$

$0.05^\circ$  resolution using the transposed convolution layer, which is a learning-based

up-sampling method. We used the strides as 2 and a  $2 \times 2$  convolution kernel to double size of

the input data. Accordingly, all data had the same size. Then we mined the characteristics of

each variable and fused the data with same types by concatenate layer. Then the temporal and

spatial features were extracted by fusing the time-series of aerosol and meteorological data

with the geographic information data. The final result was obtained through the fully

213 connected layer.

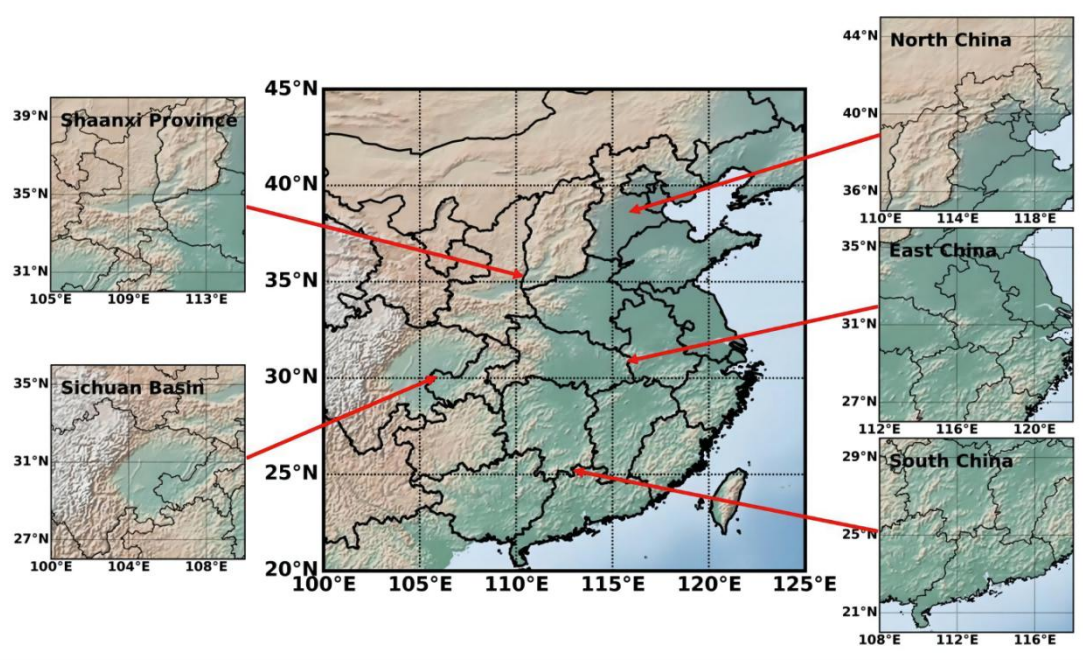

214  
215 **Figure. S3.** Locations and spatial range of major study regions. Study regions include North  
216 China, East China, South China, Sichuan Basin and Shaanxi Province.

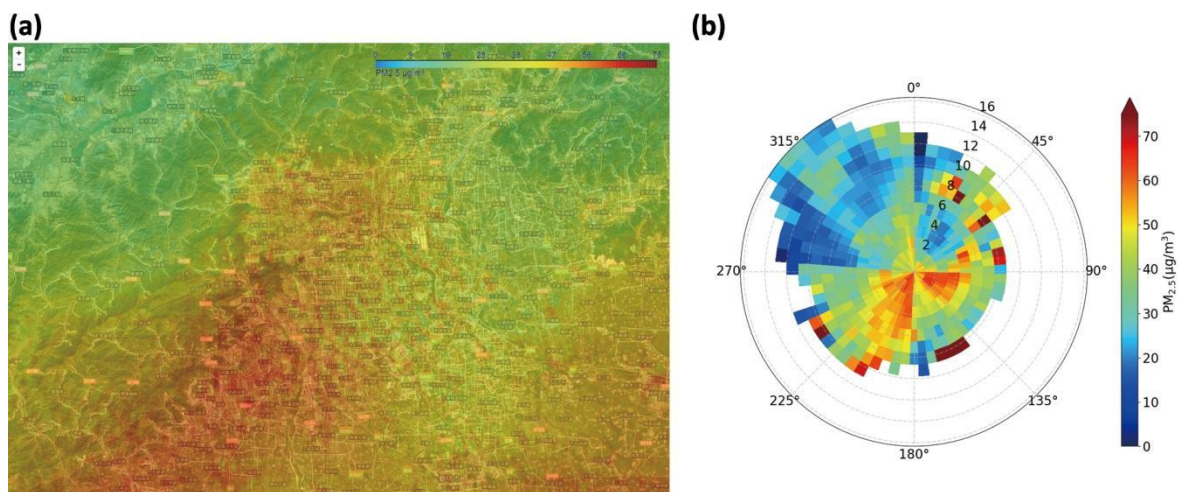

218  
219 **Figure. S4.** The annual average distribution of  $PM_{2.5}$  in Beijing (a). b is a rose, with radius  
220 representing wind speed and the color indicating mean  $PM_{2.5}$  concentrations. 0° is due north  
221 and 90° is due east. It can be seen that the main pollution comes from the southwest,  
222 significantly influenced by topography and transmission.



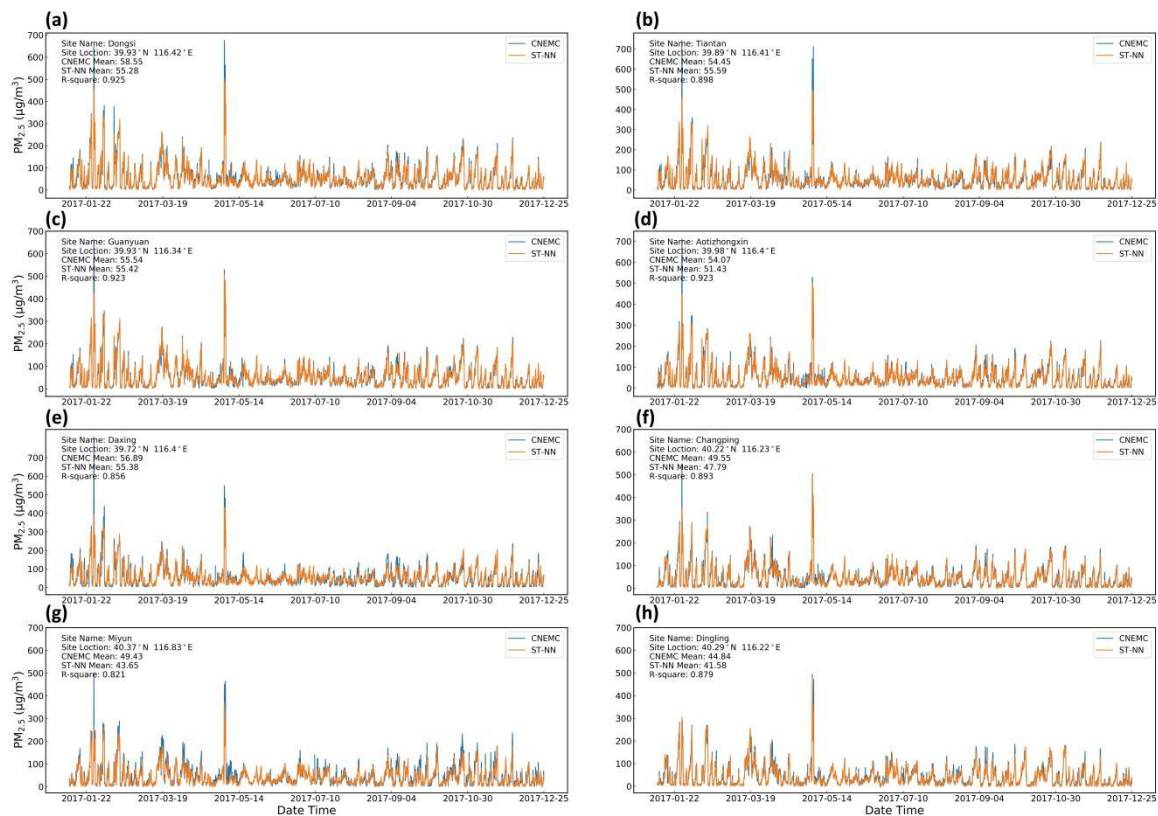

**Figure. S5.** ST-NN model predicted and ground-level observed (not used in training) time

series of PM<sub>2.5</sub> in Beijing stations. (a) Dongsì station in Beijing. (a) Tiantan station in Beijing.

(c) Guanyuan station in Beijing. (d) Aotizhognxin station in Beijing. (e) Daxing station in

Beijing. (f) Changping station in Beijing. (g) Miyun station in Beijing. (h) Dingling station in

Beijing. (a-d) stations are in city, and (e-h) are rural stations.

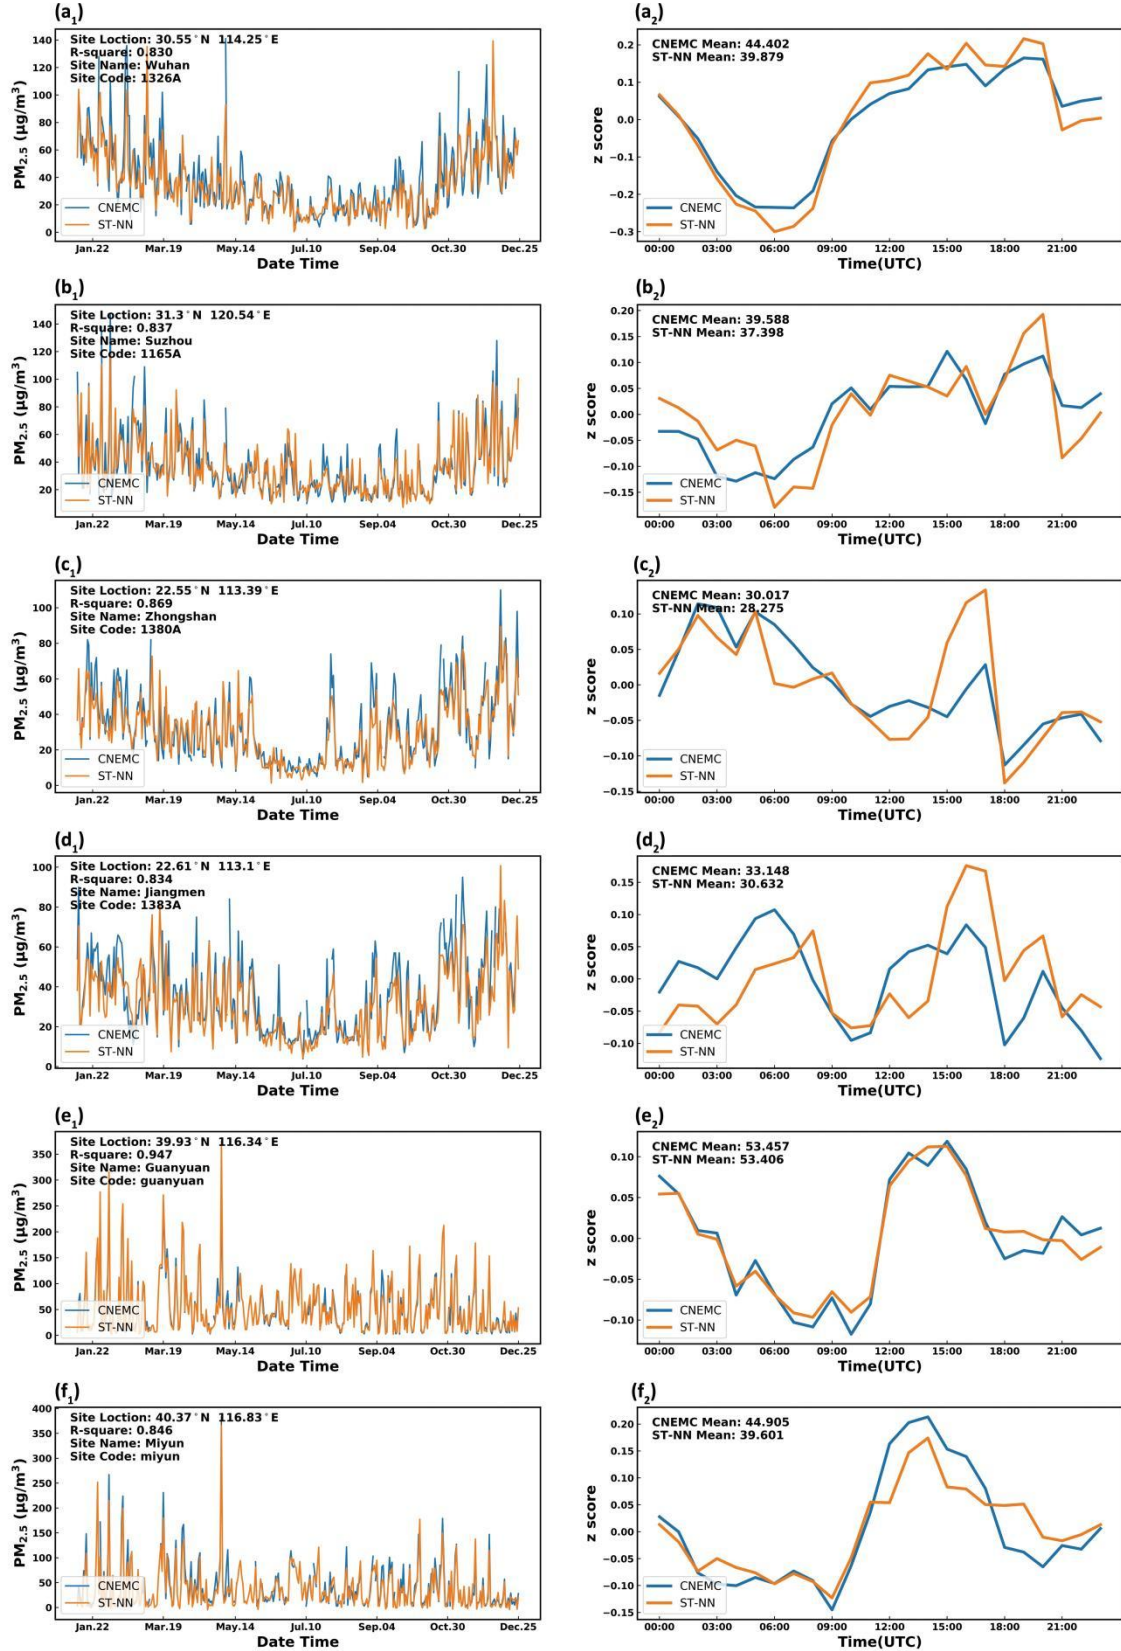

**Figure. S6.** ST-NN model predicted and ground-level observed (not used in training) time series (2017) of PM<sub>2.5</sub> in China, and comparisons of their diurnal features. Left column: ST-NN model predicted and observed time series of PM<sub>2.5</sub> in Wuhan (a<sub>1</sub>), Suzhou (b<sub>1</sub>),



Zhongshan ( $c_1$ ), Jiangmen ( $d_1$ ), Guanyuan in Beijing ( $e_1$ ), Miyun in Beijing ( $f_1$ ); Right column:  
 ST-NN model predicted and observed diurnal variation of  $PM_{2.5}$  in Wuhan ( $a_2$ ), Suzhou ( $b_2$ ),  
 Zhongshan ( $c_2$ ), Jiangmen ( $d_2$ ), Guanyuan in Beijing ( $e_2$ ), Miyun in Beijing ( $f_2$ ). Its vertical  
 axis is the z-score coordinate.  $z - \text{score} = \frac{x - \mu}{\sigma}$ ,  $\mu$  is the sample mean and  $\sigma$  is the sample  
 standard deviation.

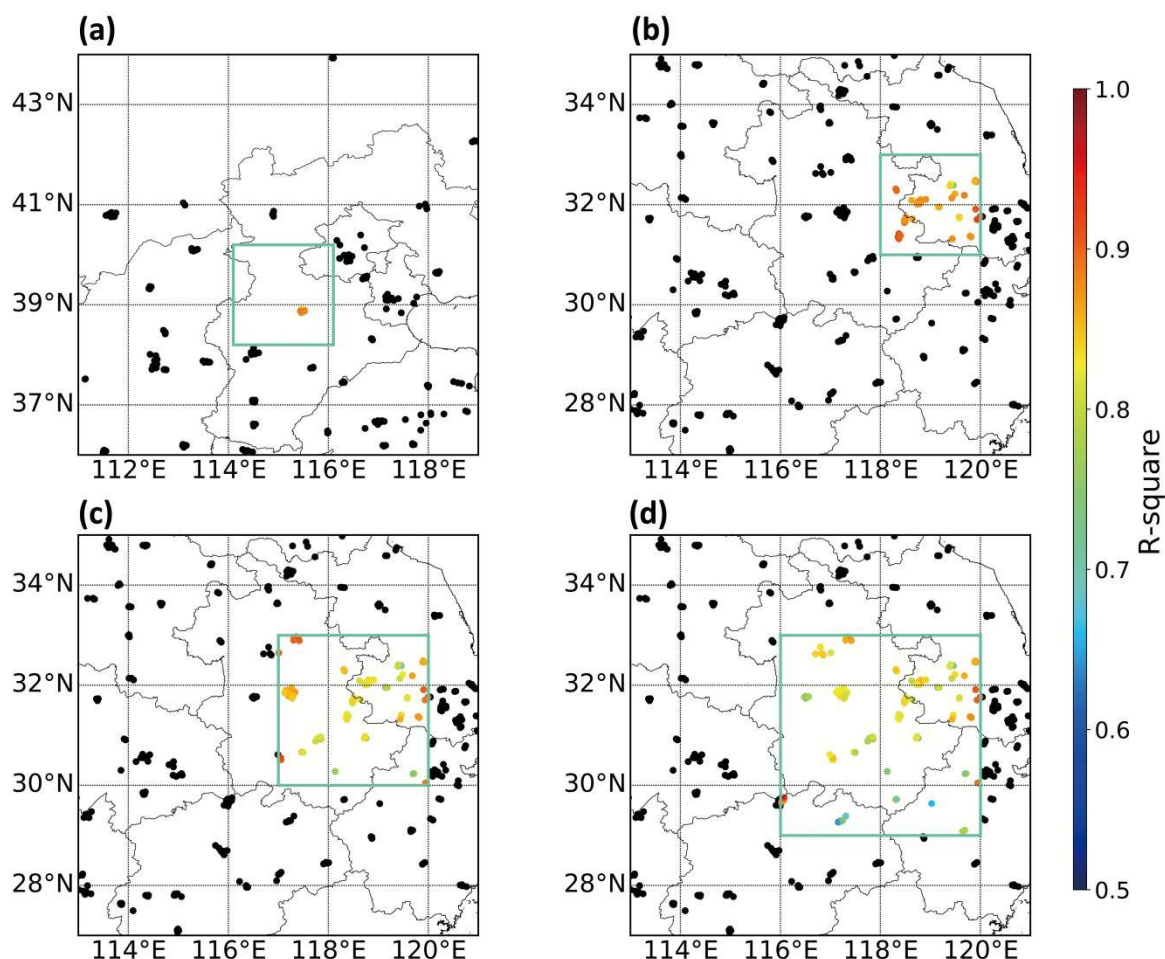

**Figure. S7.** The block distribution of the regional mask validation. Validation was carried  
 out for different spatial mask scales, the black points are the training sites, and the  
 R-square distribution of the validation sites is enclosed by the solid blue line.

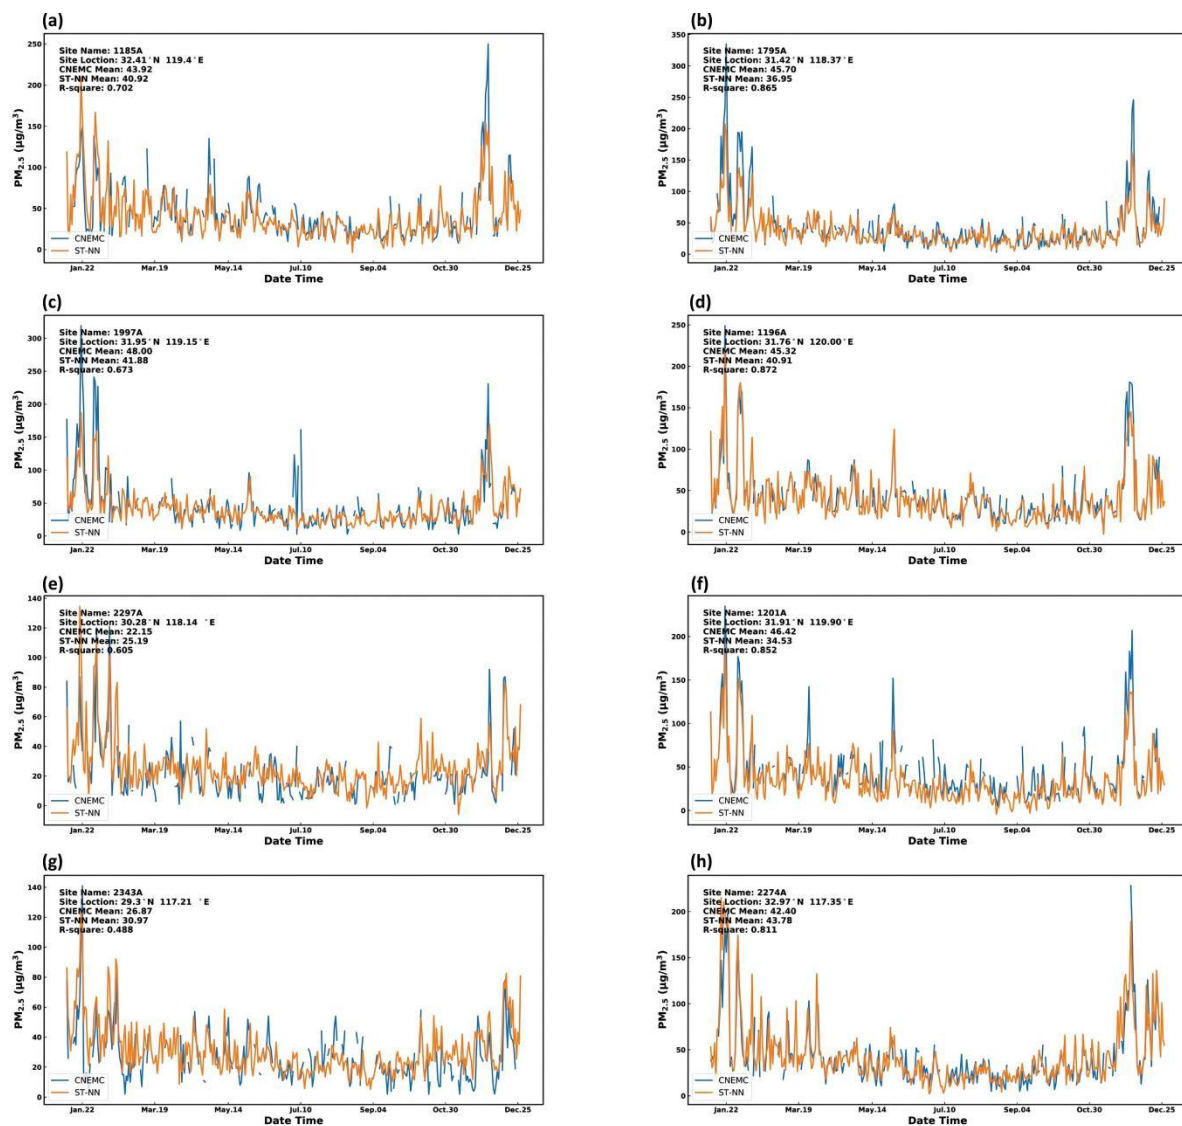

**Figure. S8.** Time series of the regional mask performed (Figure.S6b,c,d). (a,b) are the 1°x1° mask validation in the East China. (c,d) are the results of 2°x2° mask validation in the East China. (e,f) are the validation of 3°x3° mask in East China. (g,h) are the validation of 4°x4° mask in East China. And (a,b,c,g) are urban stations. (d,e,f,h) are rural stations.

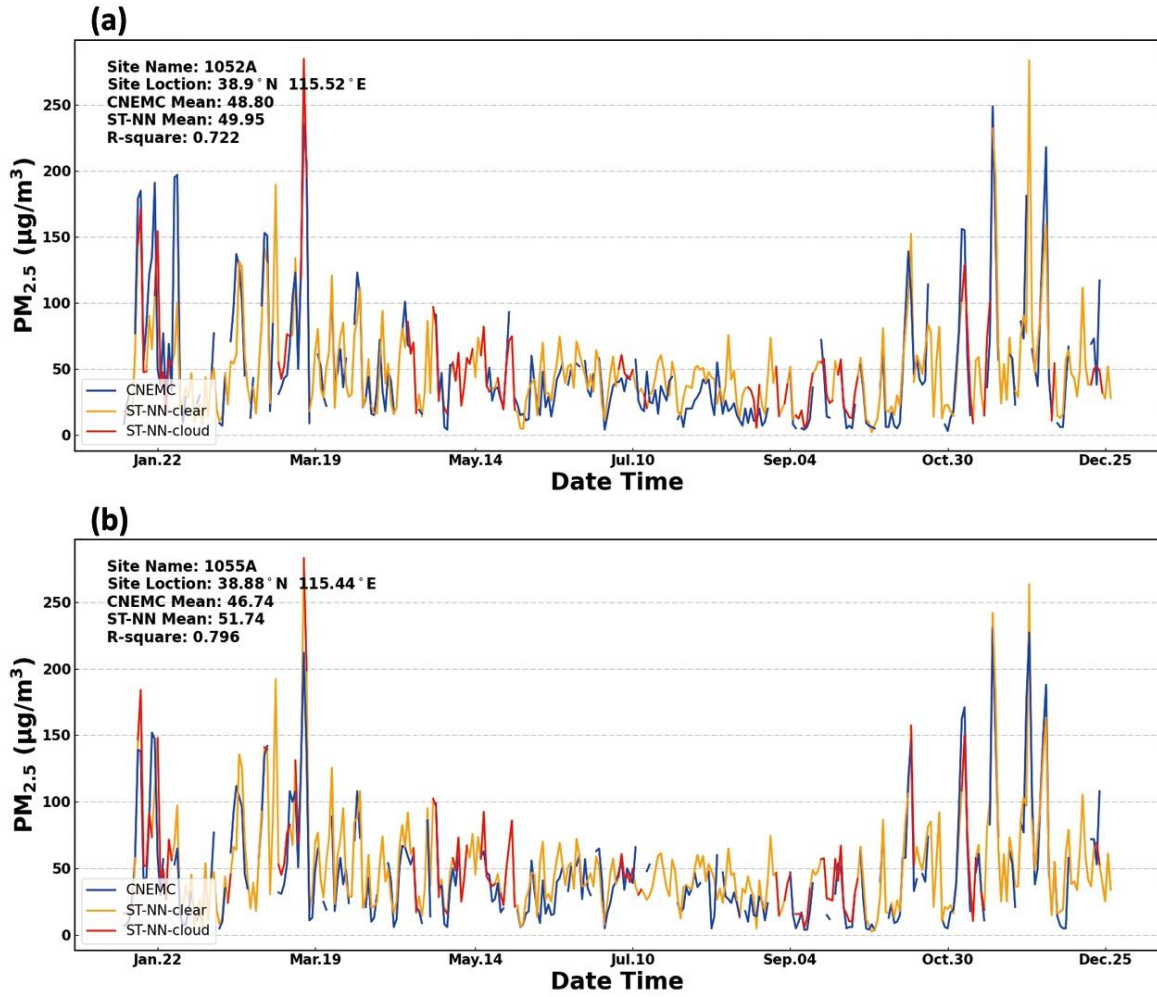

**Figure. S9.** Time series of the regional mask performed (Figure.S6a), they are the  $2^\circ \times 2^\circ$  mask validation in the North China. The blue line is the CNEMC data, the orange line is the ST-NN result for clear day, the red line is the ST-NN result for cloudy day. a is a rural station, b is an urban station.

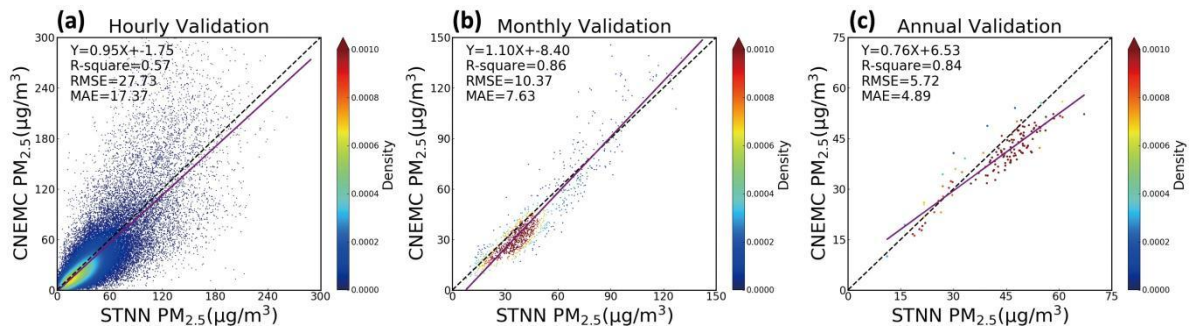

**Figure. S10.** Density scatterplots of the ST-NN model (trained with data from 2017 to

2020 and test with 2020) with hourly(a),monthly(b),annual(c) validation. The fitting line is in purple, and the 1:1 standard line is the black dotted line.

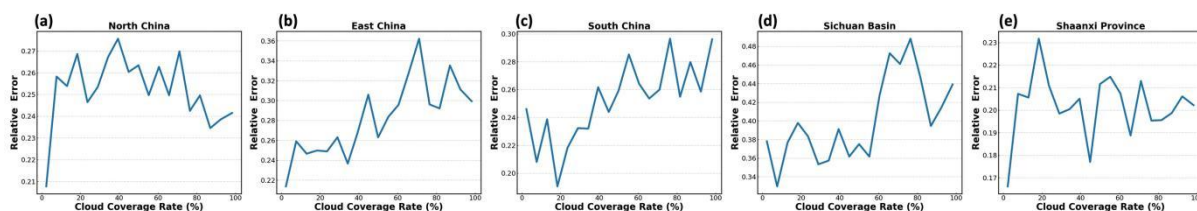

**Figure. S11.** Relative error of cross validation under different cloud coverage rates.

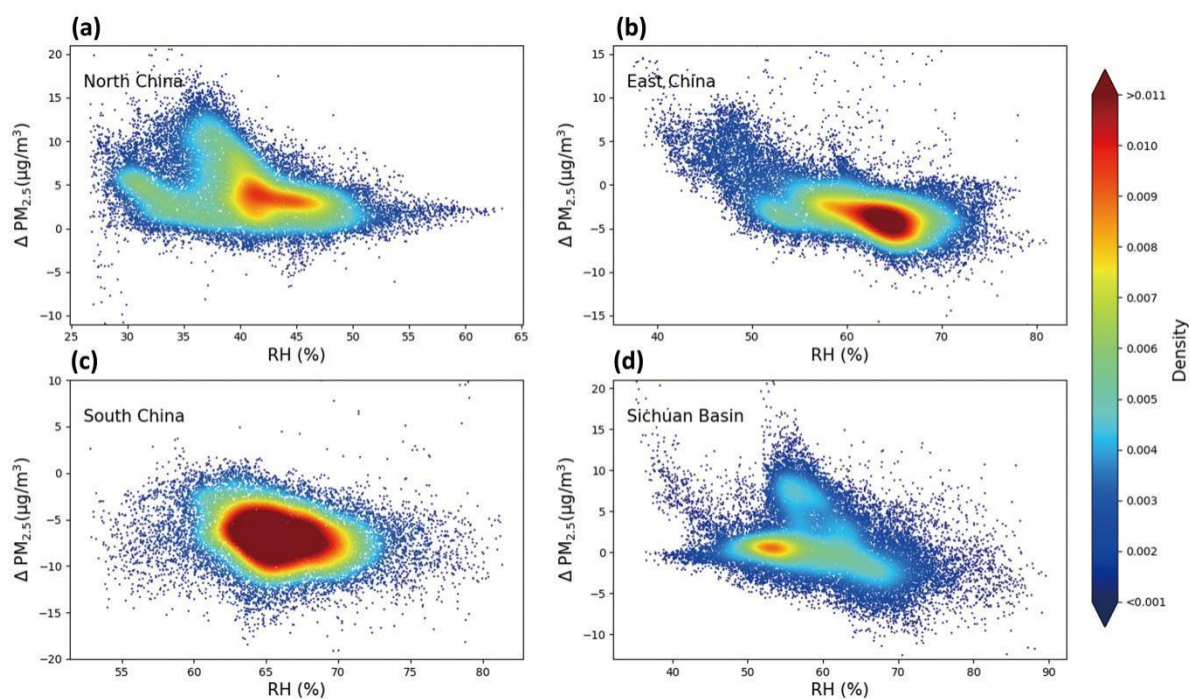

**Figure. S12.** The density distribution diagram of changes in predicted  $PM_{2.5}$  concentrations as a function of relative humidity in marked cloudy conditions. (a) North China. (b) East China. (c) South China. (d) Sichuan Basin.



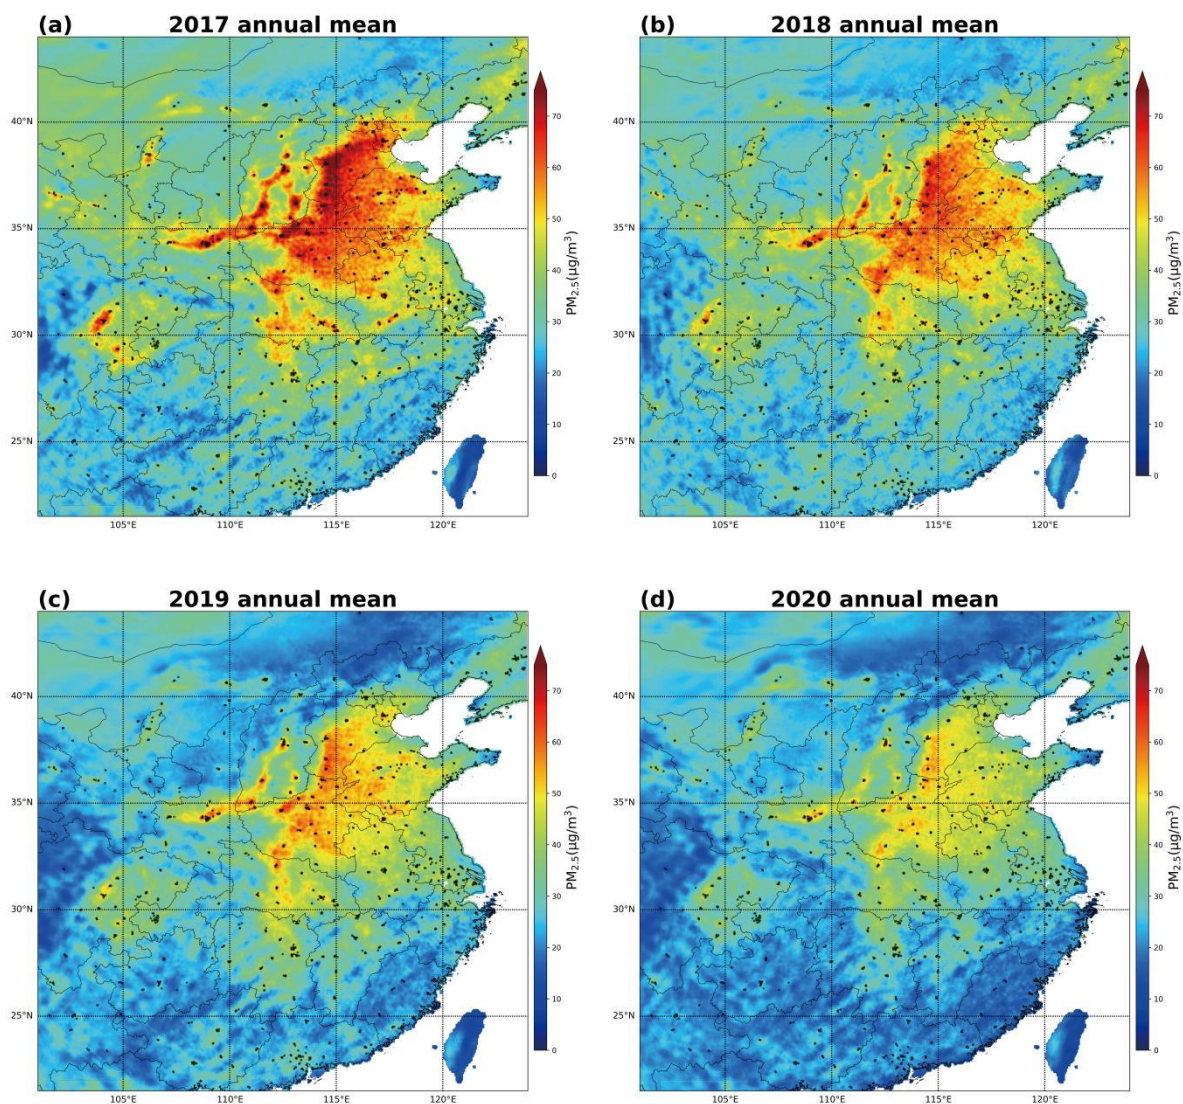

**Figure. S13.** The distribution of predicted annual mean concentrations of PM<sub>2.5</sub> and the locations of monitoring sites.

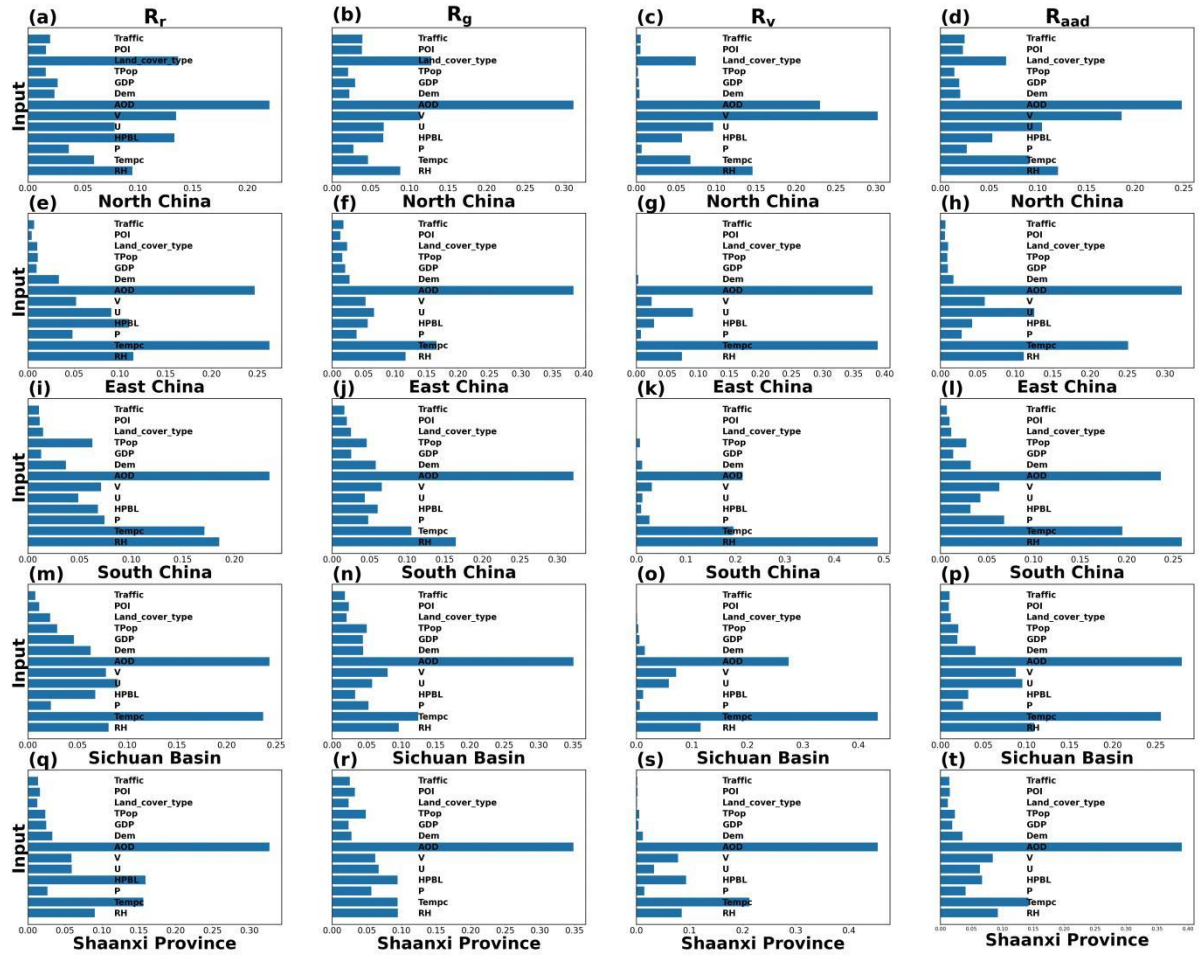

**Figure. S14.** Relative importance indicators ( $R_r$ : Relative range;  $R_g$ : Relative gradient;  $R_v$ : Relative variance;  $R_{AAD}$ : Relative average absolute deviation) of input variables for different regions. (a-d) North China. (e-h) East China. (i-l) South China. (m-p) Sichuan Basin. (q-t) Shaanxi Province.

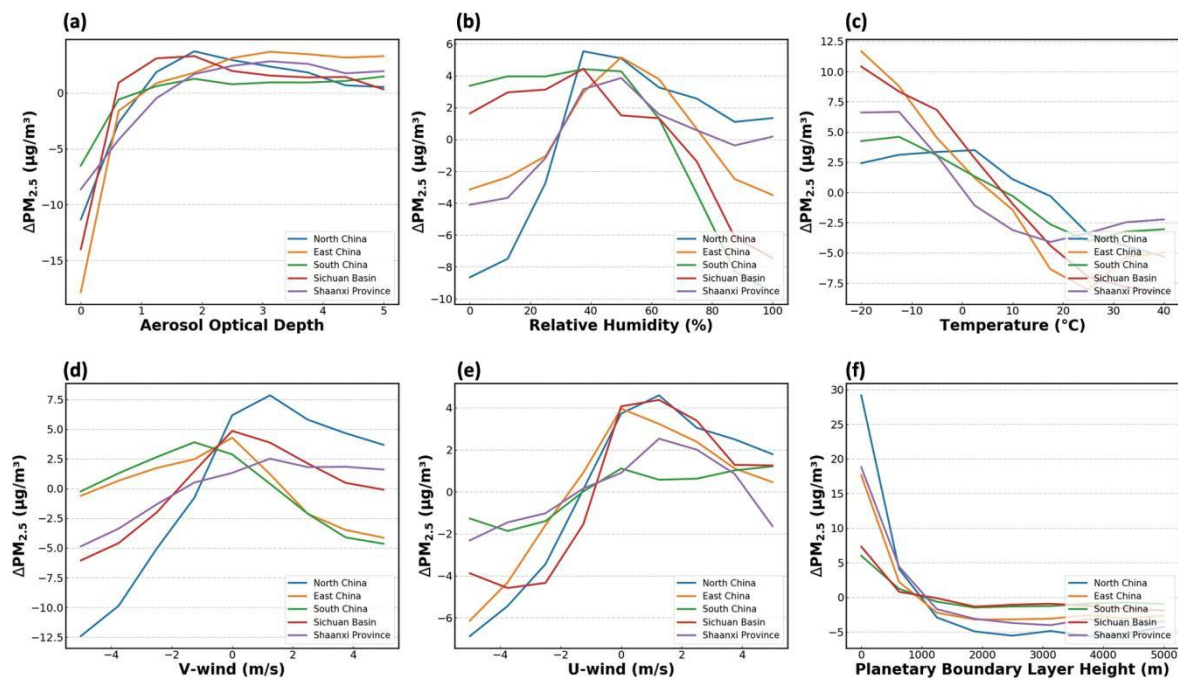

**Figure. S15. Results of sensitivity analysis of key variables.** The influence of relative humidity is mainly due to the hygroscopic growth of  $PM_{2.5}$  and the wet removal which is more pronounced in North China. The effect of temperature is mainly seasonal. Low boundary layer pressure leads to higher surface  $PM_{2.5}$  concentrations.

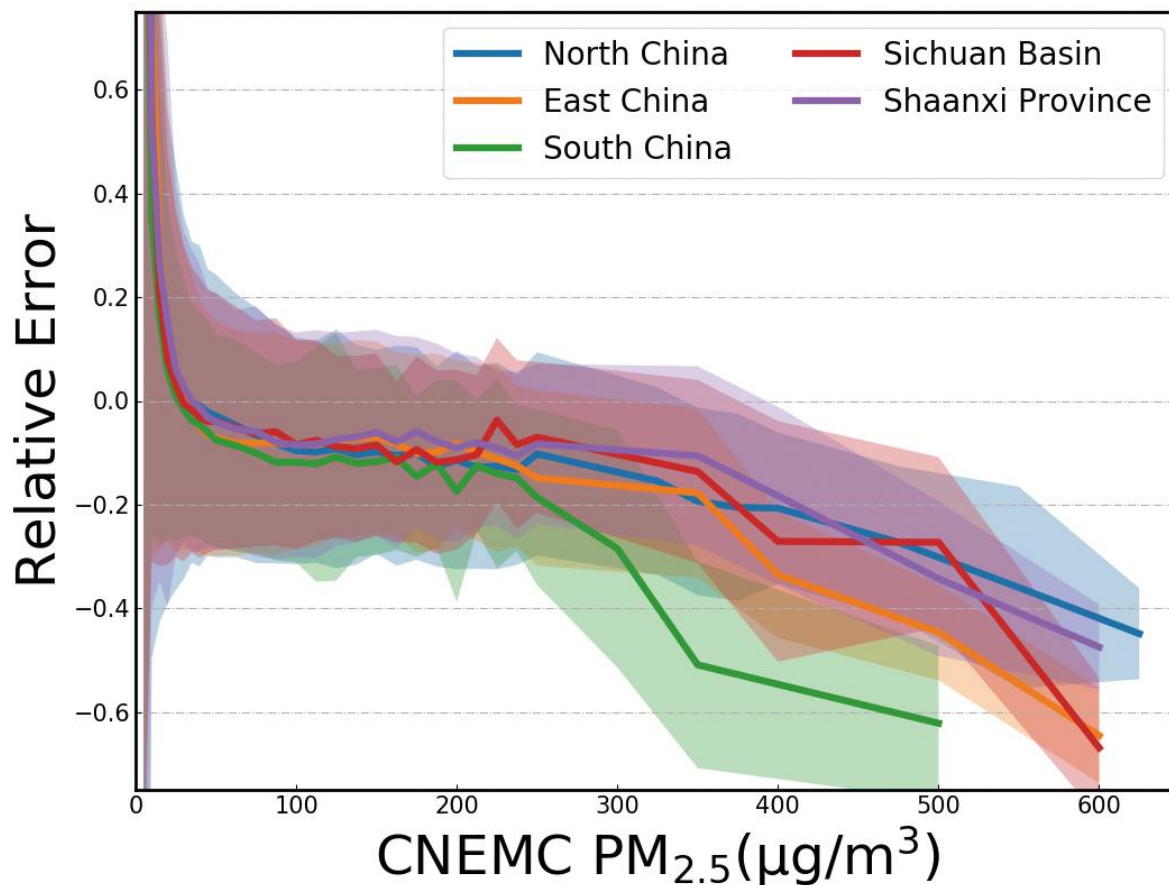

**Figure. S16.** Relative error varies with PM<sub>2.5</sub> concentrations in different regions. Five lines with different colors represent errors for North China, East China, South China, Sichuan Basin, and Shaanxi Province.



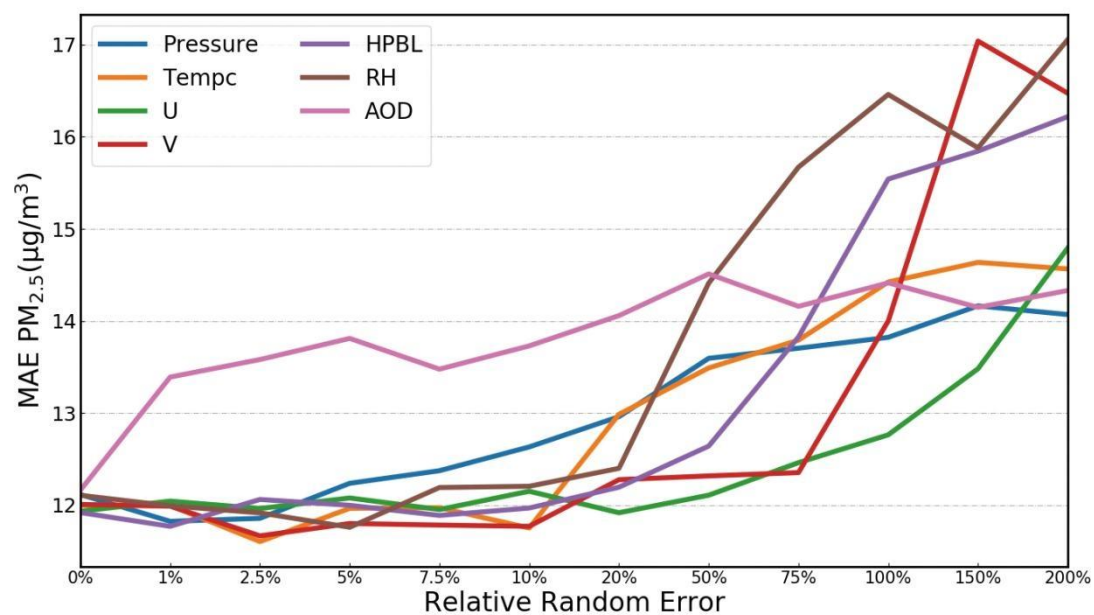

**Figure. S17.** The relationship between the mean absolute error of the model and the relative error of different input data. Seven lines with different colors represent model inputs: pressure, temperature, zonal wind (U), meridional wind (V), boundary layer height, relative humidity, and AOD.

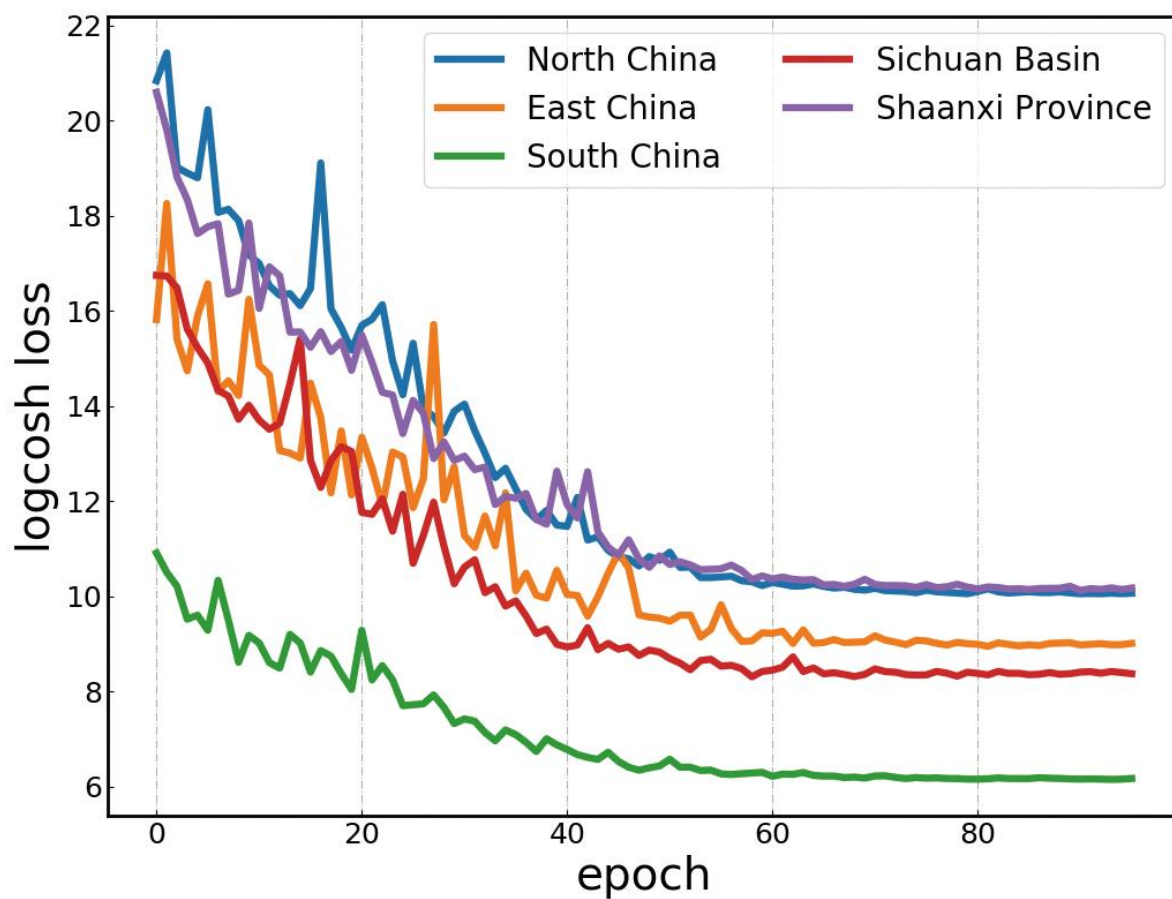

**Figure. S18.** The performance of the validation data logcosh loss function for models built for different regions. Five lines with different colors represent results for North China, East China, South China, Sichuan Basin, and Shaanxi Province.

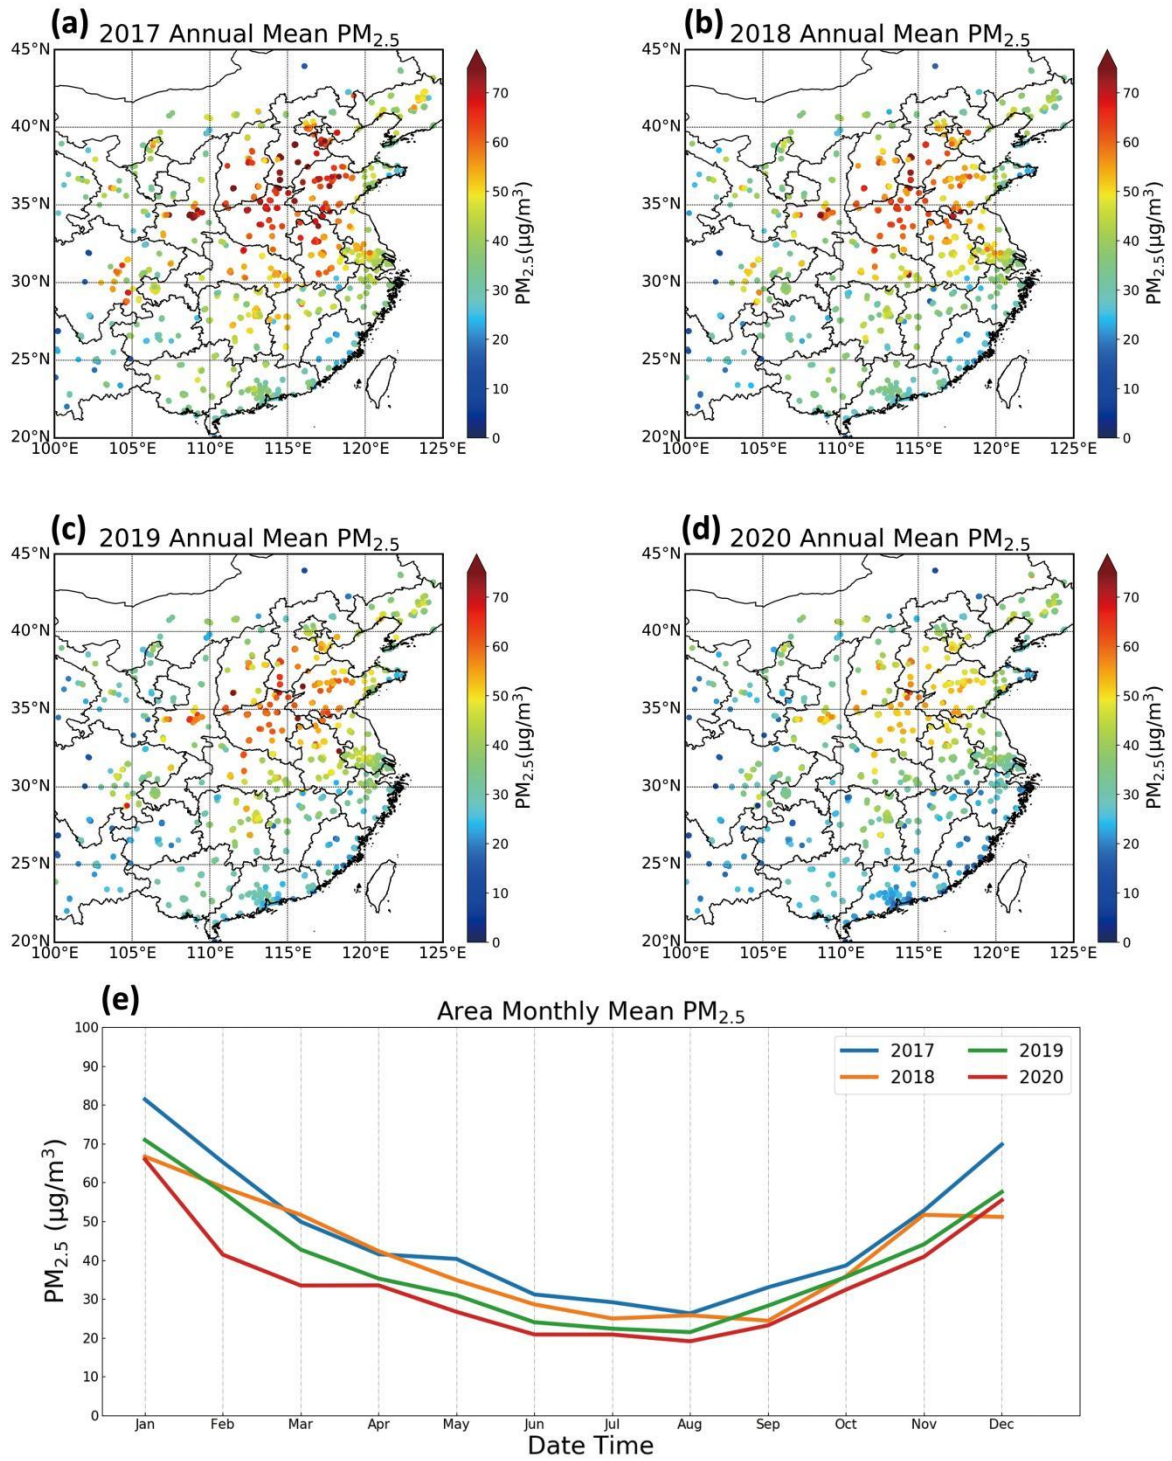

**Figure. S19.** The spatiotemporal distribution of CNEMC observed  $PM_{2.5}$  concentrations. (a) Year 2017. (b) Year 2018. (c) Year 2019. (d) Year 2020. (e) Monthly variations.
